# Supplementary figures and images for: Multivalent conjugates of basic fibroblast growth factor enhance in vitro proliferation and migration of endothelial cells
Source: Royal Society of Chemistry journal article supplement (doi:10.1039/c7bm01052d), 2018-01-01

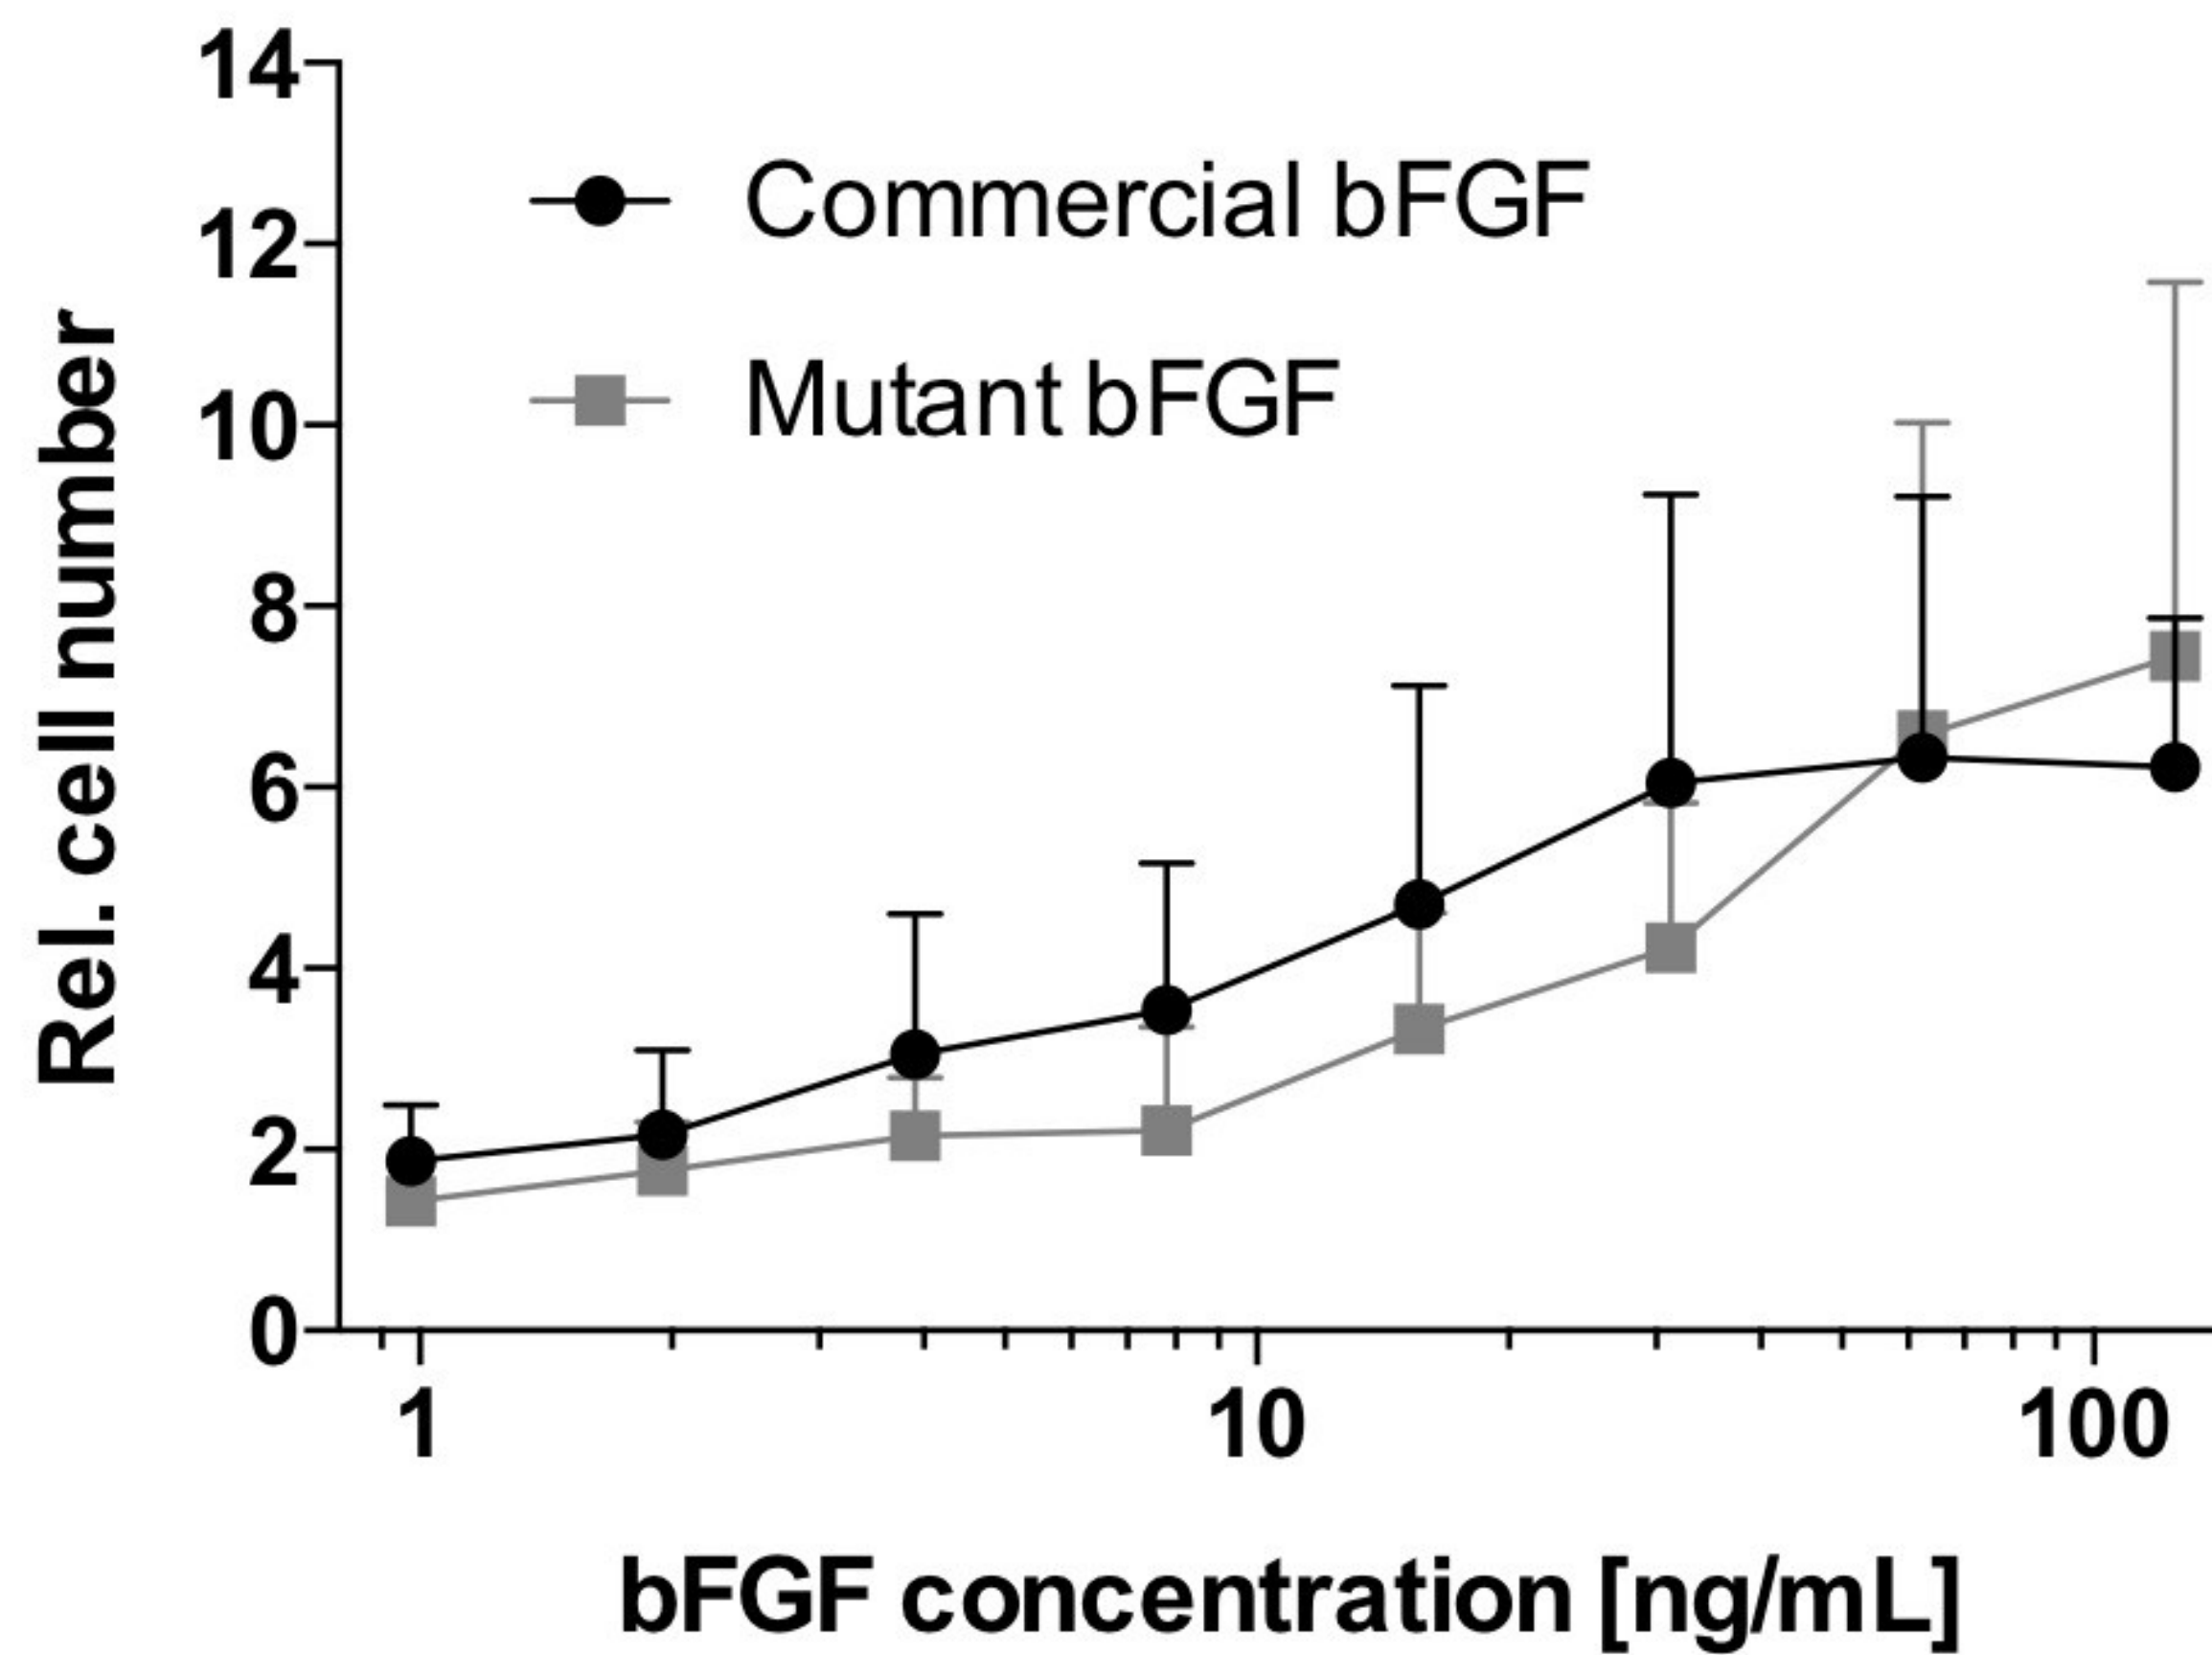

Supplement: c7bm01052d2.pdf [file c7bm01052d2.pdf]

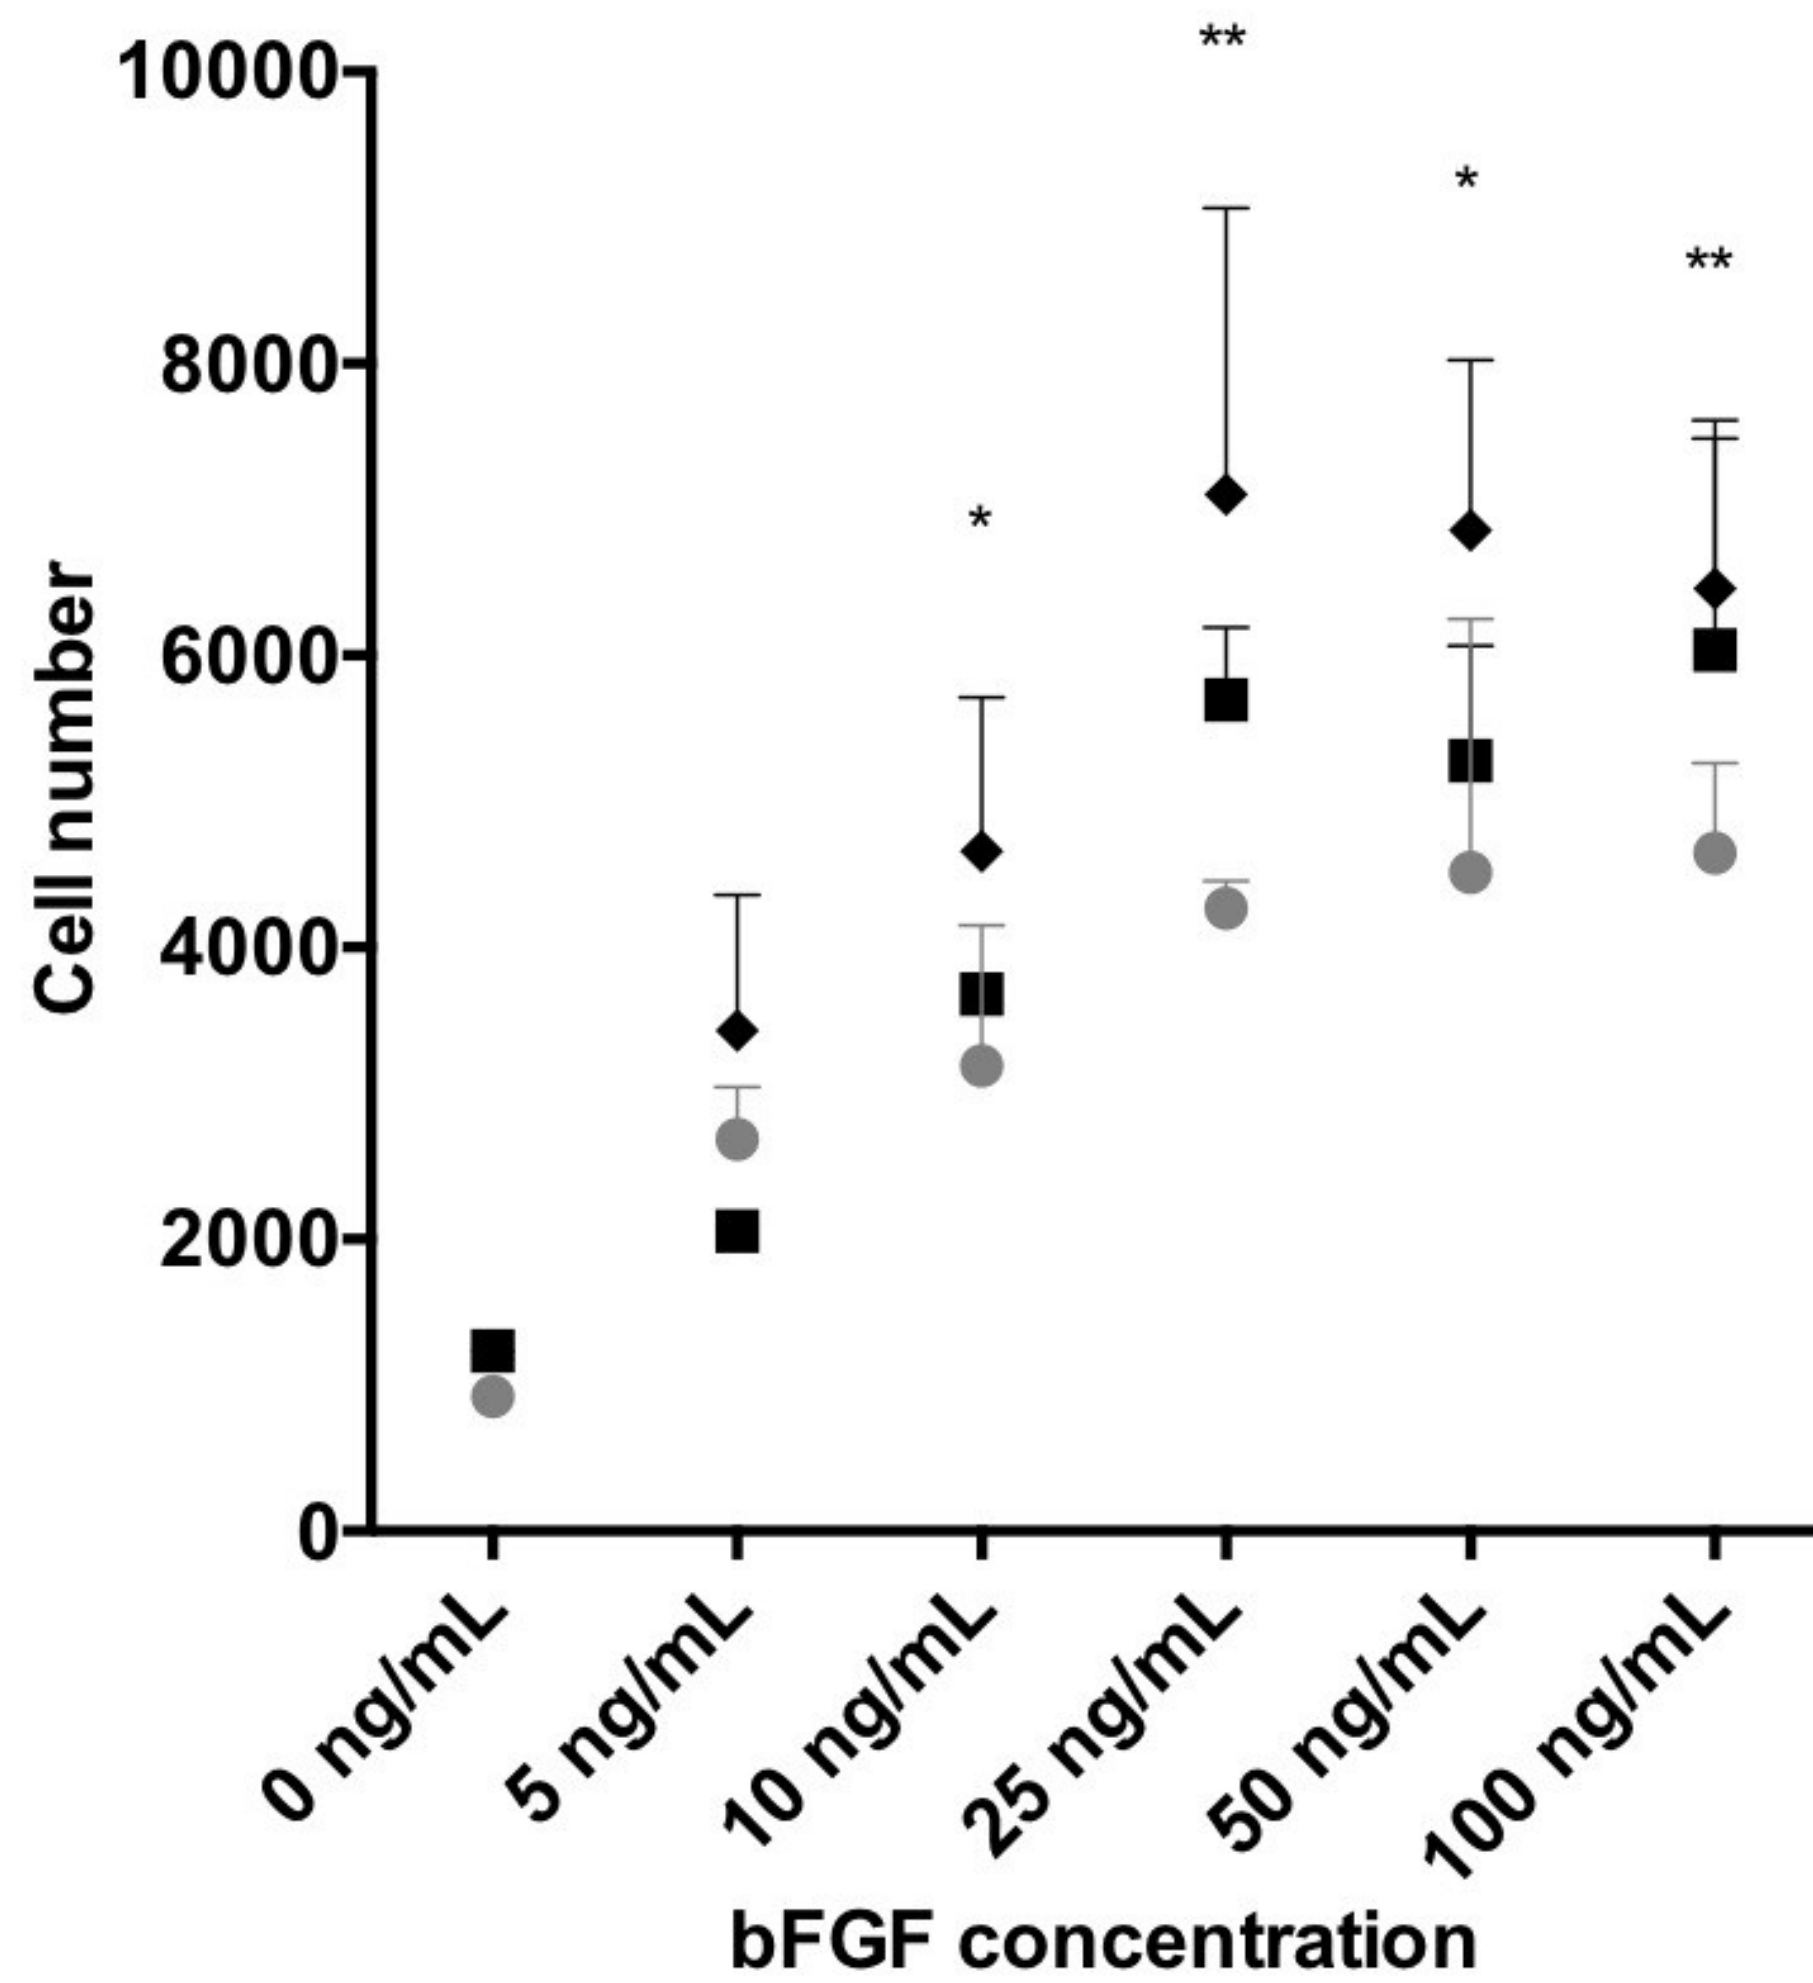

Supplement: c7bm01052d3.pdf [file c7bm01052d3.pdf]
